# Supplementary material for: A follow-up study of occupational styrene exposure and risk of autoimmune rheumatic diseases
Source: PubMed Central journal article supplement — Occup Environ Med. 2019 Dec 17;77(2):64–9. doi: 10.1136/oemed-2019-106018 (PMC7029229; doi:10.1136/oemed-2019-106018), 2019-12-17
Supplement: oemed-2019-106018supp001.pdf [file oemed-2019-106018supp001.pdf]

## **A follow-up study of occupational styrene exposure and risk of autoimmune rheumatic diseases**

Supplementary material

| Supplementary Table 1. Adjusted incidence rate ratios with 95% confidence interval for systemic sclerosis, rheumatoid arthritis, systemic lupus erythematosus, small vessel vasculitis, and Sjögren's syndrome by duration of employment, mean styrene exposure intensity and mean styrene exposure probability in 59 997 male and 12 215 female workers in the Danish reinforced plastics industry, 1979 to 2012. |                  |                              |                                 |                                        |                                   |                              |
|--------------------------------------------------------------------------------------------------------------------------------------------------------------------------------------------------------------------------------------------------------------------------------------------------------------------------------------------------------------------------------------------------------------------|------------------|------------------------------|---------------------------------|----------------------------------------|-----------------------------------|------------------------------|
|                                                                                                                                                                                                                                                                                                                                                                                                                    |                  | Men                          |                                 |                                        |                                   |                              |
|                                                                                                                                                                                                                                                                                                                                                                                                                    |                  | Systemic sclerosis<br>(n=22) | Rheumatoid arthritis<br>(n=359) | Systemic lupus<br>erythematosus (n=23) | Small vessel vasculitis<br>(n=61) | Sjögren's syndrome<br>(n=18) |
| Exposure metric                                                                                                                                                                                                                                                                                                                                                                                                    | Person-<br>years | IRR (95 % CI) <sup>a</sup>   | IRR (95 % CI) <sup>a</sup>      | IRR (95 % CI) <sup>a</sup>             | IRR (95 % CI) <sup>a</sup>        | IRR (95 % CI) <sup>a</sup>   |
| Duration of employment                                                                                                                                                                                                                                                                                                                                                                                             |                  |                              |                                 |                                        |                                   |                              |
| <1 year                                                                                                                                                                                                                                                                                                                                                                                                            | 585 835          | 1                            | 1                               | 1                                      | 1                                 | 1                            |
| 1-4 years                                                                                                                                                                                                                                                                                                                                                                                                          | 457 832          | 0.63 (0.21-1.84)             | 1.22 (0.96-1.54)                | 1.42 (0.58-3.51)                       | 1.00 (0.56-1.78)                  | 0.80 (0.28-2.24)             |
| ≥5 years                                                                                                                                                                                                                                                                                                                                                                                                           | 219 230          | 1.57 (0.59-4.20)             | 1.33 (1.01-1.74)                | 1.08 (0.33-3.56)                       | 1.06 (0.55-2.05)                  | 0.68 (0.18-2.55)             |
| Per year (trend)                                                                                                                                                                                                                                                                                                                                                                                                   |                  | 1.07 (0.99-1.15)             | 1.02 (1.00-1.04)                | 0.96 (0.84-1.09)                       | 1.00 (0.95-1.06)                  | 0.86 (0.69-1.08)             |
| Mean exposure intensity                                                                                                                                                                                                                                                                                                                                                                                            |                  |                              |                                 |                                        |                                   |                              |
| ≤11 mg/m <sup>3</sup>                                                                                                                                                                                                                                                                                                                                                                                              | 370 818          | 1                            | 1                               | 1                                      | 1                                 | 1                            |
| 12-39 mg/m <sup>3</sup>                                                                                                                                                                                                                                                                                                                                                                                            | 434 564          | 3.33 (0.72-15.34)            | 1.25 (0.93-1.68)                | 0.90 (0.36-2.26)                       | 0.84 (0.41-1.72)                  | 0.47 (0.13-1.63)             |
| ≥40 mg/m <sup>3</sup>                                                                                                                                                                                                                                                                                                                                                                                              | 457 515          | 2.52 (0.53-12.01)            | 1.38 (1.03-1.85)                | 0.24 (0.06-0.92)                       | 1.24 (0.63-2.42)                  | 0.83 (0.28-2.48)             |
| Per 10 mg/m <sup>3</sup>                                                                                                                                                                                                                                                                                                                                                                                           |                  | 1.00 (0.92-1.08)             | 1.02 (1.00-1.03)                | 0.87 (0.75-1.02)                       | 1.03 (1.00-1.07)                  | 1.01 (0.93-1.11)             |
| Mean styrene exposure probability                                                                                                                                                                                                                                                                                                                                                                                  |                  |                              |                                 |                                        |                                   |                              |
| ≤22 %                                                                                                                                                                                                                                                                                                                                                                                                              | 330 820          | 1                            | 1                               | 1                                      | 1                                 | 1                            |
| 23-56 %                                                                                                                                                                                                                                                                                                                                                                                                            | 444 077          | 0.99 (0.35-2.76)             | 0.97 (0.75-1.26)                | 1.45 (0.56-3.73)                       | 1.28 (0.68-2.41)                  | 0.32 (0.08-1.21)             |
| ≥57 %                                                                                                                                                                                                                                                                                                                                                                                                              | 488 000          | 0.98 (0.33-2.88)             | 1.08 (0.83-1.41)                | 0.45 (0.13-1.59)                       | 1.11 (0.57-2.17)                  | 0.70 (0.25-1.97)             |
| Per 1 %                                                                                                                                                                                                                                                                                                                                                                                                            |                  | 0.91 (0.18-4.62)             | 1.15 (0.78-1.70)                | 0.35 (0.07-1.80)                       | 1.07 (0.41-2.78)                  | 0.73 (0.13-4.21)             |

|                                   |             | Women                       |                                |                                        |                                   |                              |
|-----------------------------------|-------------|-----------------------------|--------------------------------|----------------------------------------|-----------------------------------|------------------------------|
|                                   |             | Systemic sclerosis<br>(n=9) | Reumatoid arthritis<br>(n=168) | Systemic lupus<br>erythematosus (n=15) | Small vessel vasculitis<br>(n=19) | Sjögren's syndrome<br>(n=24) |
| Exposure metric                   | Person-year | IRR (95 % CI) <sup>a</sup>  | IRR (95 % CI) <sup>a</sup>     | IRR (95 % CI) <sup>a</sup>             | IRR (95 % CI) <sup>a</sup>        | IRR (95 % CI) <sup>a</sup>   |
| Duration of employment            |             |                             |                                |                                        |                                   |                              |
| <1 year                           | 106 014     | 1                           | 1                              | 1                                      | 1                                 | 1                            |
| 1-4 years                         | 101 133     | 0.26 (0.03-2.38)            | 1.00 (0.72-1.38)               | 1.22 (0.41-3.64)                       | 2.82 (0.90-8.89)                  | 0.94 (0.38-2.32)             |
| ≥5 years                          | 45 082      | 2.53 (0.61-10.56)           | 0.51 (0.31-0.84)               | 0.85 (0.17-4.28)                       | 2.04 (0.50-8.23)                  | 1.04 (0.35-3.09)             |
| Per year (trend)                  |             | 1.08 (0.96-1.21)            | 0.97 (0.93-1.02)               | 1.01 (0.87-1.17)                       | 1.03 (0.93-1.13)                  | 0.98 (0.87-1.10)             |
| Mean exposure intensity           |             |                             |                                |                                        |                                   |                              |
| ≤11 mg/m <sup>3</sup>             | 152 658     | 1                           | 1                              | 1                                      | 1                                 | 1                            |
| 12-39 mg/m <sup>3</sup>           | 60 677      | 0.52 (0.06-4.66)            | 1.25 (0.87-1.78)               | 2.34 (0.77-7.11)                       | 0.38 (0.11-1.34)                  | 0.88 (0.33-2.32)             |
| ≥40 mg/m <sup>3</sup>             | 38 894      | 2.63 (0.57-12.00)           | 1.20 (0.78-1.84)               | 0.60 (0.07-5.02)                       | -                                 | 1.04 (0.33-3.24)             |
| Per 10 mg/m <sup>3</sup>          |             | 1.14 (1.01-1.29)            | 1.03 (0.98-1.08)               | 0.96 (0.78-1.19)                       | 0.47 (0.24-0.94)                  | 0.96 (0.82-1.12)             |
| Mean styrene exposure probability |             |                             |                                |                                        |                                   |                              |
| ≤22 %                             | 163 041     | 1                           | 1                              | 1                                      | 1                                 | 1                            |
| 23-56 %                           | 54 142      | 2.30 (0.51-10.39)           | 0.97 (0.65-1.45)               | 0.59 (0.13-2.70)                       | 0.69 (0.20-2.42)                  | 1.19 (0.47-3.04)             |
| ≥57 %                             | 35 046      | 2.81 (0.48-16.42)           | 1.54 (1.01-2.35)               | 1.24 (0.32-4.75)                       | 0.77 (0.17-3.50)                  | 0.33 (0.04-2.56)             |
| Per 1 %                           |             | 5.53 (0.38-80.54)           | 2.09 (1.07-4.08)               | 1.42 (0.16-12.74)                      | 0.47 (0.04-4.93)                  | 0.47 (0.06-4.03)             |

<sup>a</sup> Adjusted for age, calendar year, educational level

- : no observations

| Supplementary table 2. Adjusted <sup>1</sup> incidence rate ratios with 95% confidence interval for systemic sclerosis, rheumatoid arthritis, systemic lupus erythematosus, primary systemic vasculitis, and Sjögren's syndrome by cumulated styrene exposure in windows of time of exposure in 59 997 male and 12 215 female workers in the Danish reinforced plastics industry, 1979 to 2012. |                  |                              |                                 |                                           |                                   |                              |
|-------------------------------------------------------------------------------------------------------------------------------------------------------------------------------------------------------------------------------------------------------------------------------------------------------------------------------------------------------------------------------------------------|------------------|------------------------------|---------------------------------|-------------------------------------------|-----------------------------------|------------------------------|
|                                                                                                                                                                                                                                                                                                                                                                                                 |                  | Men                          |                                 |                                           |                                   |                              |
|                                                                                                                                                                                                                                                                                                                                                                                                 |                  | Systemic sclerosis<br>(n=22) | Rheumatoid arthritis<br>(n=359) | Systemic lupus<br>erythematosus<br>(n=23) | Small vessel vasculitis<br>(n=61) | Sjögren's syndrome<br>(n=18) |
| Cumulated styrene<br>exposure in time<br>windows                                                                                                                                                                                                                                                                                                                                                | Person-<br>years | IRR (95 % CI) <sup>a</sup>   | IRR (95 % CI) <sup>a</sup>      | IRR (95 % CI) <sup>a</sup>                | IRR (95 % CI) <sup>a</sup>        | IRR (95 % CI) <sup>a</sup>   |
| 1-5 years                                                                                                                                                                                                                                                                                                                                                                                       |                  |                              |                                 |                                           |                                   |                              |
| Unexposed <sup>b</sup>                                                                                                                                                                                                                                                                                                                                                                          | 941 804          | 1                            | 1                               | 1                                         | 1                                 | 1                            |
| 1-16 mg/m <sup>3</sup> -years                                                                                                                                                                                                                                                                                                                                                                   | 148 753          | 1.89 (0.53-6.73)             | 0.96 (0.64-1.43)                | 0.30 (0.04-2.30)                          | 0.43 (0.10-1.77)                  | 0.51 (0.07-3.93)             |
| ≥17 mg/m <sup>3</sup> -years                                                                                                                                                                                                                                                                                                                                                                    | 172 340          | 0.97 (0.20-4.56)             | 1.04 (0.68-1.58)                | -                                         | 0.91 (0.33-2.50)                  | 0.97 (0.11-8.32)             |
| Per 100 mg/m <sup>3</sup>                                                                                                                                                                                                                                                                                                                                                                       |                  | 0.92 (0.40-2.13)             | 1.03 (0.86-1.23)                | n.a                                       | 1.05 (0.73-1.49)                  | n.a                          |
| 6-10 years                                                                                                                                                                                                                                                                                                                                                                                      |                  |                              |                                 |                                           |                                   |                              |
| Unexposed <sup>b</sup>                                                                                                                                                                                                                                                                                                                                                                          | 935 384          | 1                            | 1                               | 1                                         | 1                                 | 1                            |
| 1-23 mg/m <sup>3</sup> -years                                                                                                                                                                                                                                                                                                                                                                   | 151 523          | 1.59 (0.46-5.51)             | 0.73 (0.49-1.11)                | 1.67 (0.55-5.09)                          | 0.32 (0.08-1.33)                  | 2.47 (0.78-7.83)             |
| ≥24 mg/m <sup>3</sup> -years                                                                                                                                                                                                                                                                                                                                                                    | 175 990          | 0.31 (0.04-2.45)             | 1.02 (0.69-1.49)                | 0.36 (0.05-2.84)                          | 0.51 (0.17-1.50)                  | 2.86 (0.52-15.67)            |
| Per 100 mg/m <sup>3</sup>                                                                                                                                                                                                                                                                                                                                                                       |                  | 1.05 (0.68-1.63)             | 1.01 (0.87-1.17)                | 0.09 (0.00-9.47)                          | 0.90 (0.58-1.40)                  | 1.08 (0.51-2.25)             |
| 11-15 years                                                                                                                                                                                                                                                                                                                                                                                     |                  |                              |                                 |                                           |                                   |                              |
| Unexposed <sup>b</sup>                                                                                                                                                                                                                                                                                                                                                                          | 969 997          | 1                            | 1                               | 1                                         | 1                                 | 1                            |
| 1-32 mg/m <sup>3</sup> -years                                                                                                                                                                                                                                                                                                                                                                   | 135 108          | 1.38 (0.31-6.12)             | 1.03 (0.72-1.48)                | 1.82 (0.61-5.46)                          | 0.48 (0.15-1.54)                  | 0.97 (0.22-4.27)             |
| ≥33 mg/m <sup>3</sup> -years                                                                                                                                                                                                                                                                                                                                                                    | 157 792          | 2.55 (0.93-6.96)             | 1.09 (0.78-1.53)                | -                                         | 0.69 (0.26-1.80)                  | -                            |
| Per 100 mg/m <sup>3</sup>                                                                                                                                                                                                                                                                                                                                                                       |                  | 1.10 (0.80-1.51)             | 1.05 (0.94-1.16)                | 0.16 (0.01-4.86)                          | 1.05 (0.81-1.35)                  | n.a                          |
| ≥16 years                                                                                                                                                                                                                                                                                                                                                                                       |                  |                              |                                 |                                           |                                   |                              |
| Unexposed <sup>b</sup>                                                                                                                                                                                                                                                                                                                                                                          | 733 858          | 1                            | 1                               | 1                                         | -                                 | 1                            |
| 1-49 mg/m <sup>3</sup> -years                                                                                                                                                                                                                                                                                                                                                                   | 245 006          | 0.51 (0.14-1.86)             | 1.15 (0.87-1.53)                | 2.67 (0.95-7.54)                          | 2.62 (1.27-5.40)                  | 0.38 (0.10-1.39)             |
| ≥50 mg/m <sup>3</sup> -years                                                                                                                                                                                                                                                                                                                                                                    | 284 033          | 0.87 (0.32-2.36)             | 1.34 (1.04-1.74)                | 1.46 (0.46-4.58)                          | 2.37 (1.16-4.84)                  | 0.42 (0.13-1.37)             |
| Per 100 mg/m <sup>3</sup>                                                                                                                                                                                                                                                                                                                                                                       |                  | 1.04 (0.92-1.17)             | 1.02 (0.99-1.05)                | 0.87 (0.61-1.24)                          | 1.05 (1.00-1.11)                  | 0.73 (0.41-1.31)             |

|                                                  |                  | Women                       |                                 |                                           |                                   |                              |
|--------------------------------------------------|------------------|-----------------------------|---------------------------------|-------------------------------------------|-----------------------------------|------------------------------|
|                                                  |                  | Systemic sclerosis<br>(n=9) | Rheumatoid arthritis<br>(n=168) | Systemic lupus<br>erythematosus<br>(n=15) | Small vessel vasculitis<br>(n=19) | Sjögren's syndrome<br>(n=24) |
| Cumulated styrene<br>exposure in time<br>windows | Person-<br>years | IRR (95 % CI) <sup>a</sup>  | IRR (95 % CI) <sup>a</sup>      | IRR (95 % CI) <sup>a</sup>                | IRR (95 % CI) <sup>a</sup>        | IRR (95 % CI) <sup>a</sup>   |
| 1-5 years                                        |                  |                             |                                 |                                           |                                   |                              |
| Unexposed <sup>b</sup>                           | 187 474          | 1                           | 1                               | 1                                         | 1                                 | 1                            |
| 1-16 mg/m <sup>3</sup> -years                    | 44 164           | -                           | 0.86 (0.53-1.41)                | 1.24 (0.37-4.16)                          | 2.17 (0.66-7.14)                  | 1.84 (0.60-5.60)             |
| ≥17 mg/m <sup>3</sup> -years                     | 20 591           | -                           | 0.50 (0.20-1.25)                | -                                         | 3.73 (0.75-18.65)                 | -                            |
| Per 100 mg/m <sup>3</sup>                        |                  | -                           | 0.40 (0.09-1.70)                | 0.22 (0.00-123.12)                        | 1.25 (0.40-3.89)                  | n.a                          |
| 6-10 years                                       |                  |                             |                                 |                                           |                                   |                              |
| Unexposed <sup>b</sup>                           | 188 395          | 1                           | 1                               | 1                                         | 1                                 | 1                            |
| 1-23 mg/m <sup>3</sup> -years                    | 44 142           | 3.18 (0.70-14.48)           | 0.93 (0.58-1.47)                | 0.26 (0.03-2.02)                          | 1.78 (0.56-5.61)                  | 1.08 (0.31-3.72)             |
| ≥24 mg/m <sup>3</sup> -years                     | 19 692           | 2.54 (0.25-25.60)           | 1.02 (0.51-2.02)                | -                                         | 1.15 (0.14-9.58)                  | -                            |
| Per 100 mg/m <sup>3</sup>                        |                  | 1.21 (0.42-3.48)            | 0.82 (0.48-1.40)                | n.a                                       | 0.78 (0.12-5.17)                  | n.a                          |
| 11-15 years                                      |                  |                             |                                 |                                           |                                   |                              |
| Unexposed <sup>b</sup>                           | 197 366          | 1                           | 1                               | 1                                         | 1                                 | 1                            |
| 1-32 mg/m <sup>3</sup> -years                    | 38 785           | 0.71 (0.08-6.13)            | 0.50 (0.27-0.90)                | 1.89 (0.59-6.03)                          | 1.70 (0.55-5.21)                  | 1.56 (0.52-4.63)             |
| ≥33 mg/m <sup>3</sup> -years                     | 16 078           | 7.01 (0.99-49.90)           | 1.05 (0.55-1.98)                | -                                         | -                                 | -                            |
| Per 100 mg/m <sup>3</sup>                        |                  | 2.06 (1.56-2.72)            | 0.99 (0.71-1.38)                | 0.59 (0.05-6.52)                          | 0.18 (0.00-23.29)                 | 0.67 (0.07-6.60)             |
| ≥16 years                                        |                  |                             |                                 |                                           |                                   |                              |
| Unexposed <sup>b</sup>                           | 152 022          | 1                           | 1                               | 1                                         | 1                                 | 1                            |
| 1-49 mg/m <sup>3</sup> -years                    | 69 439           | 0.68 (0.12-4.01)            | 0.98 (0.67-1.41)                | 2.42 (0.76-7.69)                          | 0.77 (0.28-2.11)                  | 0.26 (0.08-0.79)             |
| ≥50 mg/m <sup>3</sup> -years                     | 30 768           | 1.66 (0.26-10.74)           | 1.22 (0.79-1.88)                | -                                         | 0.22 (0.03-1.77)                  | 0.80 (0.30-2.18)             |
| Per 100 mg/m <sup>3</sup>                        |                  | 0.89 (0.36-2.20)            | 1.05 (0.96-1.15)                | 0.68 (0.18-2.61)                          | 0.06 (0.00-2.03)                  | 0.77 (0.40-1.46)             |

<sup>a</sup> Adjusted for age, calendar year, educational level

<sup>b</sup> Unexposed refers to exposed person-years that lies outside the time window of interest

n.a: not applicable

- : no observations
